# Supplementary material for: FDA-ARGOS is a database with public quality-controlled reference genomes for diagnostic use and regulatory science
Source: PubMed Central journal article supplement (PMC6658474; doi:10.1038/s41467-019-11306-6), 2019-07-25
Supplement: 41467_2019_11306_MOESM1_ESM.pdf [file 41467_2019_11306_MOESM1_ESM.pdf]

Supplementary Information:

FDA-ARGOS: Public Quality-Controlled Reference Genomes for Diagnostic Use and Regulatory Science

Sichtig et. al.

Supplementary Table 1

A: FDA-ARGOS Metadata Coverage

| Metadata # | Metadata Name         | # Samples | % Samples |
|------------|-----------------------|-----------|-----------|
| 1          | ORGANISM              | 487       | 100.00%   |
| 2          | STRAIN                | 487       | 100.00%   |
| 3          | IDENTIFICATION METHOD | 487       | 100.00%   |
| 4          | ISOLATION SOURCE      | 487       | 100.00%   |
| 5          | HOST                  | 487       | 100.00%   |
| 6          | COLLECTED BY          | 487       | 100.00%   |
| 7          | CULTURE COLLECTION    | 487       | 100.00%   |
| 8          | TAXONOMY_ID           | 487       | 100.00%   |
| 9          | CONTACT:EMAIL         | 487       | 100.00%   |
| 10         | PACKAGE               | 487       | 100.00%   |
| Addtl      | geo_loc_name          | 400       | 82.14%    |
| Addtl      | collection_date       | 362       | 74.33%    |
| Addtl      | host_disease          | 303       | 62.22%    |
| Addtl      | host_sex              | 205       | 42.09%    |
| Addtl      | host_age              | 200       | 41.07%    |

B: FDA-ARGOS PACKAGE Metadata Coverage

| PACKAGE       | # Samples | % Samples |
|---------------|-----------|-----------|
| Clinical      | 399       | 81.93%    |
| Environmental | 88        | 18.07%    |

C: FDA-ARGOS IDENTIFICATION METHOD Metadata Coverage

| IDENTIFICATION METHOD                                                   | # Samples | % Samples |
|-------------------------------------------------------------------------|-----------|-----------|
| phenotypic identification/ characterization                             | 347       | 71.25%    |
| 16S and MLST                                                            | 26        | 5.34%     |
| RT-PCR and amplicon sequencing                                          | 23        | 4.72%     |
| Phenotypic and Molecular Methods                                        | 22        | 4.52%     |
| RT-PCR                                                                  | 22        | 4.52%     |
| culture                                                                 | 21        | 4.31%     |
| real-time PCR, EM, deep sequencing                                      | 9         | 1.85%     |
| culture, 16S                                                            | 5         | 1.03%     |
| isoenzymes, DNA sequencing                                              | 2         | 0.41%     |
| PCR, DNA sequencing                                                     | 1         | 0.21%     |
| culture and biochemical testing                                         | 1         | 0.21%     |
| culture and phenotypic identification                                   | 1         | 0.21%     |
| culture, culture and spot test, serum bactericidal assay                | 1         | 0.21%     |
| culture, plasmid agarose gel electrophoresis, phenotypic identification | 1         | 0.21%     |
| culture, repetitive element PCR                                         | 1         | 0.21%     |
| Gram stain and anaerobic culture                                        | 1         | 0.21%     |
| histology of at least 2 biospy sites, Warthin-Starry silver stain       | 1         | 0.21%     |
| MLST                                                                    | 1         | 0.21%     |
| PCR - multiple targets                                                  | 1         | 0.21%     |

Supplementary Table 2

**A: Metagenomics E. Avium CLC Genomics Workbench Analysis (Total Mapped Reads)**

| Species    | Replicate 1 | Percent | Replicate 2 | Percent | Replicate 3 | Percent | Average     | Percent |
|------------|-------------|---------|-------------|---------|-------------|---------|-------------|---------|
| E. avium   | 379         | 0.0033  | 571         | 0.0045  | 1226        | 0.0107  | 725.33      | 0.01    |
| H. sapiens | 10996939    | 96.23   | 12020125    | 95.75   | 9434390     | 82.56   | 10817151.33 | 91.52   |

**B: Metagenomics E. Avium CLC Genomics Workbench Analysis (Reads in Aligned Pairs)**

| Species    | Replicate 1 | Percent | Replicate 2 | Percent | Replicate 3 | Percent | Average    | Percent |
|------------|-------------|---------|-------------|---------|-------------|---------|------------|---------|
| E. avium   | 362         | 0.0032  | 558         | 0.0044  | 1202        | 0.0105  | 424.40     | 0.01    |
| H. sapiens | 9695338     | 84.84   | 10374660    | 82.65   | 8082686     | 70.73   | 5630570.30 | 79.41   |

**C: Metagenomics E. Avium CLC Genomics Workbench Analysis (Total Reads)**

| Replicate 1 | Replicate 2 | Replicate 3 | Average     |
|-------------|-------------|-------------|-------------|
| 11427304    | 12553052    | 11427304    | 11802553.33 |

### Supplementary Table 3

#### Limit of Detection (LoD) Table EBOV Serum

| PFU/ml         | Median EBOV Reads | Median Percent Reads Mapped | CoV         | Min - Max Mapped Reads per Index | Positive Detection |
|----------------|-------------------|-----------------------------|-------------|----------------------------------|--------------------|
| 100000 (run 1) | 75107             | 0.067290926                 | 0.932770546 | 1049-167863                      | 20/20              |
| 100000 (run 2) | 67330.5           | 0.066819427                 | 0.934177256 | 1199-257990                      | 20/20              |
| NTC            | 33.5              | 0.004173915                 | -           | 7-107                            | -                  |

#### Notes:

- Precision across the 40 replicates performed on two different sequencing runs on different days = 5.50%.
- Run 1 contained 28,663,203 and Run 2 contained 25,064,302 reads post trim.
