# Supplementary material for: FDA-ARGOS is a database with public quality-controlled reference genomes for diagnostic use and regulatory science
Source: PubMed Central journal article supplement (PMC6658474; doi:10.1038/s41467-019-11306-6), 2019-07-25
Supplement: 41467_2019_11306_MOESM12_ESM.pdf [file 41467_2019_11306_MOESM12_ESM.pdf]

- Title: Supplementary Data 1  
Description: FDA-ARGOS Reference Genome Database: NCBI Accessions and Assembly Quality Metrics (487 novel FDA-ARGOS nucleotide sequences presented in this manuscript and deposited in the NCBI GenBank nucleotide database).

Title: Supplementary Data 2

Description: Normalized NCBI Nt and FDA-ARGOS database instances (accession codes for all 200 database instance assembly sets from use case 1).

Title: Supplementary Data 3

Description: Read Classification Results from Metagenomics Shotgun Data of Mock Clinical Human Blood Sample Spiked with  $10^5$  *Enterococcus avium*

Title: Supplementary Data 4

Description: MegaBLAST *E.avium* Metagenome Raw Data

Title: Supplementary Data 5

Description: Kraken *E.avium* Metagenome Raw Data

Title: Supplementary Data 6

Description: Read Classification Results from Isolate Shotgun Data of Spiked *Enterococcus avium*

Title: Supplementary Data 7

Description: MegaBLAST *E.avium* Isolate Raw Data

Title: Supplementary Data 8

Description: Kraken *E.avium* Isolate Raw Data

Title: Supplementary Data 9

Description: Benchmark and *In Silico* Performance of MIPS BDBV and EBOV Assay
